# Supplementary material for: Preoperative determinants of quality of life a year after coronary artery bypass grafting: a historical cohort study
Source: Springer Nature journal article supplement (doi:10.1186/s13019-018-0798-2), 2018-11-19
Supplement: MOESM1 [file 16279890]

Supplementary table 1 Reference scores for SF-12 health related quality of life (26).

| Age group     | Physical HRQL | Mental HRQL |
|---------------|---------------|-------------|
| Overall       | 50.6 ± 9.2    | 50.2 ± 9.2  |
| 50 – 59 years | 50.5 ± 9.5    | 50.7 ± 9.0  |
| 60 – 69 years | 50.5 ± 8.2    | 51.1 ± 8.7  |
| 70 – 79 years | 44.4 ± 11.2   | 49.5 ± 8.5  |
