# Supplementary material for: Preoperative determinants of quality of life a year after coronary artery bypass grafting: a historical cohort study
Source: Springer Nature journal article supplement (doi:10.1186/s13019-018-0798-2), 2018-11-19
Supplement: MOESM2 [file 16279890]

Supplementary table 2. Baseline characteristics for patients with and without postoperative SF-12

|                                        | With pre- and<br>postoperative SF-12<br>N=658 | With missing SF-12<br>N=1442 | P value |
|----------------------------------------|-----------------------------------------------|------------------------------|---------|
| <b>Demographics</b>                    |                                               |                              |         |
| Age (yr)                               | 65.5 ± 9.0                                    | 66.3 ± 10.2                  | 0.003   |
| Male gender                            | 542 (82.4%)                                   | 1110 (77.0%)                 | 0.005   |
| Body mass index (kg/m <sup>2</sup> )   | 26.8 (24.6-29.8)                              | 27.0 (24.6-29.9)             | 0.736   |
| Hypertension                           | 338 (51.4%)                                   | 761 (52.8%)                  | 0.550   |
| Atrial fibrillation                    | 26 (4.0%)                                     | 44 (3.1%)                    | 0.287   |
| Diabetes Mellitus                      | 133 (20.2%)                                   | 376 (26.1%)                  | 0.004   |
| Stroke                                 | 54 (8.2%)                                     | 129 (8.9%)                   | 0.577   |
| Pulmonary disease                      | 50 (7.6%)                                     | 122 (8.5%)                   | 0.504   |
| Peripheral vascular disease            | 68 (10.3%)                                    | 166 (11.5%)                  | 0.426   |
| Unstable Angina                        | 65 (9.9%)                                     | 177 (12.3%)                  | 0.111   |
| Myocardial infarction                  | 75 (11.4%)                                    | 222 (15.4%)                  | 0.015   |
| Left ventricular ejection fraction     |                                               |                              | 0.002   |
| Normal (>50%)                          | 546 (83.0%)                                   | 1074 (74.5%)                 |         |
| Moderate (30-50%)                      | 94 (14.3%)                                    | 293 (20.3%)                  |         |
| Poor (<30%)                            | 18 (2.7%)                                     | 53 (3.7%)                    |         |
| EuroSCORE                              | 3 (1-4)                                       | 3 (2-5)                      | <0.001  |
| Preoperative creatinine (umol/l)       | 82 (73-95)                                    | 84 (73-99)                   | 0.127   |
| Preoperative hemoglobin (mmol/l)       | 8.8 (8.2-9.3)                                 | 8.6 (7.9-9.2)                | <0.001  |
| <b>Surgical characteristics</b>        |                                               |                              |         |
| Duration of surgery (min)              | 189 (163-226)                                 | 193 (161-228)                | 0.419   |
| Extra corporeal circulation time (min) | 83 (68-101)                                   | 84 (68-103)                  | 0.783   |
| Mini extra corporeal circulation       | 485 (73.7%)                                   | 990 (68.7%)                  | 0.019   |
| Use of internal mammary artery         | 626 (95.1%)                                   | 1359 (94.2%)                 | 0.404   |

|                                    |               |               |       |
|------------------------------------|---------------|---------------|-------|
| Packed red blood cell transfusion* | 54 (8.2%)     | 193 (13.4%)   | 0.001 |
| Blood loss (ml)**                  | 660 (519-850) | 700 (530-938) | 0.002 |

---

Data are presented as mean ( $\pm$ standard deviation), medians (interquartile range) or frequencies (%).

\* Intraoperative packed red blood cell transfusion

\*\* Blood loss at 24 hours after surgery

---
